# Supplementary material for: Biosiliceous and geochemical response to biotic and climatic events in the Palaeocene
Source: Copernicus journal article supplement (doi:10.5194/cp-21-1431-2025), 2025-08-08
Supplement: Supplementary file 1 [file cp-21-1431-2025-supplement.zip]

*Supplement of*

**Biosiliceous and geochemical response to biotic and climatic events in the Palaeocene**

**Cécile Figus et al.**

Correspondance to: Cécile Figus ([cecile.figus@phd.usz.edu.pl](mailto:cecile.figus@phd.usz.edu.pl))

### *Biogenic opal determination*

The  $\text{bioSiO}_2$  flux is obtained via the following calculations:

$$\text{bioSiO}_2 \text{ flux (g/cm}^2\text{/kyr)} = \text{wt\% SiO}_2 \text{ (component weight/bulk sediment weight)} \times \text{DBD} \times \text{LSR}$$

With DBD the sediment dry bulk density in  $\text{g/cm}^3$  and LSR the linear sedimentation rate in  $\text{cm/kyr}$ . The DBD is taken from the original drilling reports and interpolated between samples, while the LSR is calculated from the updated age-depth model.

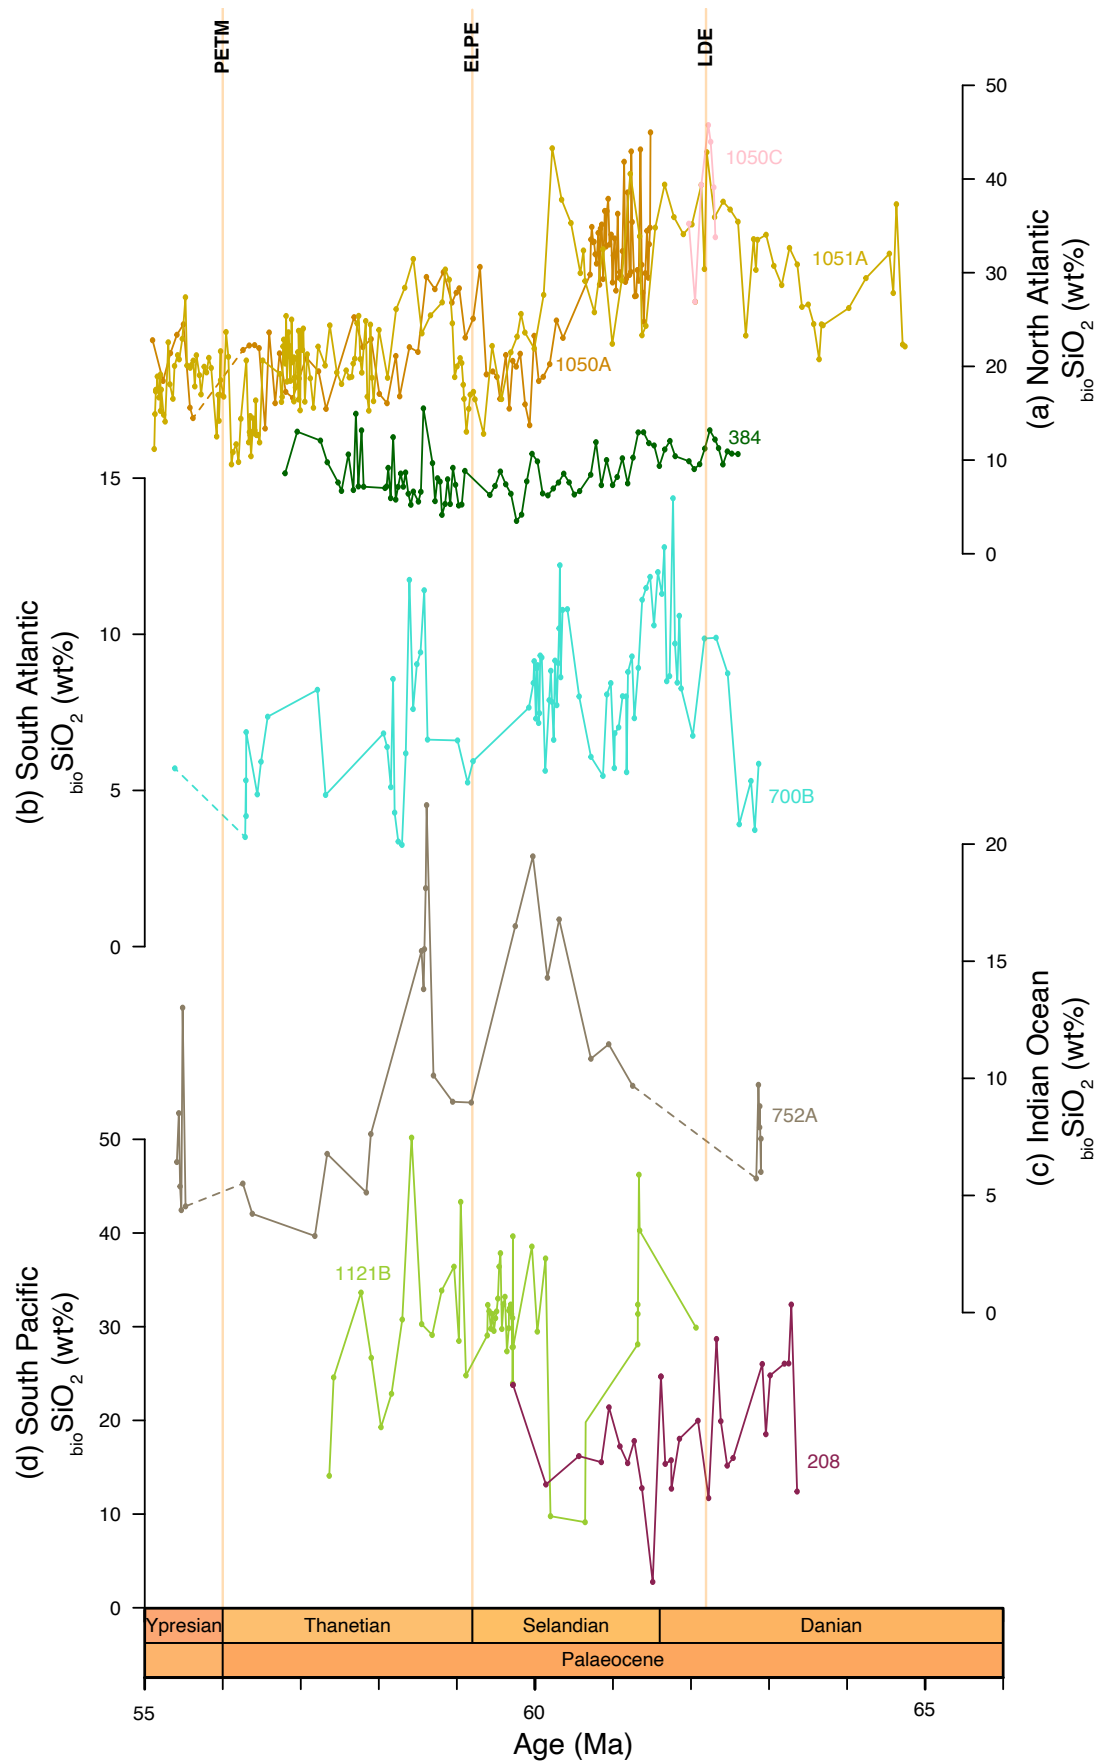

**Fig. S1.** Percent weight of biogenic silica at study Sites/Holes in the (a) North Atlantic, (b) South Atlantic, (c) Indian Ocean and (d) South Pacific. Results for Holes 1050A, 1050C and 1051A are from Witkowski et al. (2021). PETM: Palaeocene Eocene Thermal Maximum (~56 Ma), ELPE: Early Late Palaeocene Event (~59.2 Ma), LDE: Latest Danian Event (~62.2 Ma).

**Table S1.** Results of biogenic opal determination and stable isotope analyses.

| Site/<br>Hole | Core | Section | Top<br>(cm) | Bottom<br>(cm) | Depth<br>(mbsf) | Revised<br>age (Ma) | wt%<br>SiO <sub>2</sub> | bioSiO <sub>2</sub><br>flux (g/<br>cm <sup>2</sup> /kyr) | Norm.<br>$\delta^{13}\text{C}$ (‰<br>VPDB<br>mean) | Norm.<br>$\delta^{18}\text{O}$ (‰<br>VPDB<br>mean) |
|---------------|------|---------|-------------|----------------|-----------------|---------------------|-------------------------|----------------------------------------------------------|----------------------------------------------------|----------------------------------------------------|
| 208           | 29   | 4       | 15          | 16             | 544.13          | 59.72               | 23.80 %                 | 0.1353                                                   |                                                    |                                                    |
| 208           | 29   | 5       | 15          | 16             | 545.63          | 60.14               | 13.16 %                 | 0.0748                                                   |                                                    |                                                    |
| 208           | 29   | 6       | 15          | 16             | 547.13          | 60.56               | 16.19 %                 | 0.0920                                                   |                                                    |                                                    |
| 208           | 30   | 1       | 15          | 16             | 548.15          | 60.85               | 15.54 %                 | 0.0884                                                   |                                                    |                                                    |
| 208           | 30   | 1       | 50          | 51             | 548.5           | 60.95               | 21.40 %                 | 0.1216                                                   |                                                    |                                                    |
| 208           | 30   | 1       | 100         | 101            | 549             | 61.09               | 17.23 %                 | 0.0979                                                   |                                                    |                                                    |
| 208           | 30   | 1       | 135         | 136            | 549.35          | 61.19               | 15.44 %                 | 0.0878                                                   |                                                    |                                                    |
| 208           | 30   | 2       | 15          | 16             | 549.65          | 61.27               | 17.80 %                 | 0.1012                                                   |                                                    |                                                    |
| 208           | 30   | 2       | 50          | 51             | 550             | 61.37               | 12.77 %                 | 0.0726                                                   |                                                    |                                                    |
| 208           | 30   | 2       | 99          | 100            | 550.49          | 61.51               | 2.76 %                  | 0.0157                                                   |                                                    |                                                    |
| 208           | 30   | 3       | 15          | 16             | 551.15          | 61.61               | 24.68 %                 | 0.2497                                                   |                                                    |                                                    |
| 208           | 30   | 3       | 50          | 51             | 551.5           | 61.67               | 15.36 %                 | 0.1553                                                   |                                                    |                                                    |
| 208           | 30   | 3       | 98          | 100            | 551.98          | 61.74               | 15.75 %                 | 0.1593                                                   |                                                    |                                                    |
| 208           | 30   | 3       | 100         | 101            | 552             | 61.75               | 12.71 %                 | 0.1286                                                   |                                                    |                                                    |
| 208           | 30   | 4       | 15          | 16             | 552.65          | 61.85               | 18.04 %                 | 0.1824                                                   |                                                    |                                                    |
| 208           | 30   | 5       | 15          | 16             | 554.15          | 62.09               | 19.96 %                 | 0.2019                                                   |                                                    |                                                    |
| 208           | 30   | 5       | 101         | 102            | 555.01          | 62.22               | 11.70 %                 | 0.1184                                                   |                                                    |                                                    |
| 208           | 30   | 6       | 15          | 16             | 555.65          | 62.32               | 28.69 %                 | 0.2902                                                   |                                                    |                                                    |
| 208           | 30   | 6       | 50          | 51             | 556             | 62.38               | 19.91 %                 | 0.2014                                                   |                                                    |                                                    |
| 208           | 30   | 6       | 102         | 103            | 556.52          | 62.46               | 15.17 %                 | 0.1534                                                   |                                                    |                                                    |
| 208           | 30   | CC      |             |                | 557             | 62.54               | 15.99 %                 | 0.1617                                                   |                                                    |                                                    |
| 208           | 31   | 1       | 136         | 137            | 559.36          | 62.91               | 26.02 %                 | 0.2632                                                   |                                                    |                                                    |
| 208           | 31   | 2       | 15          | 16             | 559.65          | 62.96               | 18.52 %                 | 0.1874                                                   |                                                    |                                                    |
| 208           | 31   | 2       | 50          | 51             | 560             | 63.01               | 24.80 %                 | 0.2509                                                   |                                                    |                                                    |
| 208           | 31   | 3       | 15          | 16             | 561.15          | 63.19               | 26.05 %                 | 0.2635                                                   |                                                    |                                                    |
| 208           | 31   | 3       | 50          | 51             | 561.5           | 63.25               | 26.08 %                 | 0.3878                                                   |                                                    |                                                    |
| 208           | 31   | 3       | 81          | 82             | 561.81          | 63.28               | 32.36 %                 | 0.4813                                                   |                                                    |                                                    |
| 208           | 31   | CC      |             |                | 562.5           | 63.36               | 12.41 %                 | 0.1846                                                   |                                                    |                                                    |
| 384           | 6    | 1       | 52          | 53             | 99.12           | 56.80               | 8.59 %                  | 0.0168                                                   |                                                    |                                                    |
| 384           | 6    | 1       | 81          | 82             | 99.41           | 56.95               | 13.03 %                 | 0.0255                                                   |                                                    |                                                    |
| 384           | 6    | 2       | 1           | 2              | 100.11          | 57.25               | 12.08 %                 | 0.0421                                                   |                                                    |                                                    |
| 384           | 6    | 2       | 50          | 51             | 100.6           | 57.34               | 9.77 %                  | 0.0363                                                   |                                                    |                                                    |
| 384           | 6    | 2       | 127         | 128            | 101.37          | 57.48               | 7.61 %                  | 0.0295                                                   |                                                    |                                                    |
| 384           | 6    | 3       | 1           | 2              | 101.61          | 57.52               | 6.71 %                  | 0.0274                                                   |                                                    |                                                    |
| 384           | 6    | 3       | 50          | 51             | 102.1           | 57.61               | 10.60 %                 | 0.0450                                                   |                                                    |                                                    |

| Site/<br>Hole | Core | Section | Top<br>(cm) | Bottom<br>(cm) | Depth<br>(mbsf) | Revised<br>age (Ma) | wt%<br>SiO <sub>2</sub> | bioSiO <sub>2</sub><br>flux (g/<br>cm <sup>2</sup> /kyr) | Norm.<br>δ <sup>13</sup> C (‰<br>VPDB<br>mean) | Norm.<br>δ <sup>18</sup> O (‰<br>VPDB<br>mean) |
|---------------|------|---------|-------------|----------------|-----------------|---------------------|-------------------------|----------------------------------------------------------|------------------------------------------------|------------------------------------------------|
| 384           | 6    | 3       | 102         | 103            | 102.62          | 57.67               | 6.80 %                  | 0.0756                                                   |                                                |                                                |
| 384           | 6    | 4       | 1           | 2              | 103.11          | 57.70               | 14.94 %                 | 0.1641                                                   |                                                |                                                |
| 384           | 6    | 4       | 50          | 51             | 103.6           | 57.74               | 7.18 %                  | 0.0838                                                   |                                                |                                                |
| 384           | 6    | 4       | 113         | 114            | 104.23          | 57.78               | 13.17 %                 | 0.1513                                                   |                                                |                                                |
| 384           | 6    | CC      | 5           | 6              | 104.65          | 57.80               | 7.16 %                  | 0.0836                                                   |                                                |                                                |
| 384           | 7    | 1       | 89          | 90             | 108.89          | 58.08               | 7.02 %                  | 0.0819                                                   |                                                |                                                |
| 384           | 7    | 1       | 120         | 121            | 109.20          | 58.10               | 7.18 %                  | 0.0859                                                   |                                                |                                                |
| 384           | 7    | 2       | 2           | 2              | 109.52          | 58.12               | 9.17 %                  | 0.1123                                                   |                                                |                                                |
| 384           | 7    | 2       | 50          | 51             | 110.00          | 58.15               | 5.94 %                  | 0.0753                                                   |                                                |                                                |
| 384           | 7    | 2       | 100         | 101            | 110.50          | 58.18               | 12.44 %                 | 0.1571                                                   |                                                |                                                |
| 384           | 7    | 3       | 1           | 2              | 111.01          | 58.21               | 5.78 %                  | 0.0727                                                   |                                                |                                                |
| 384           | 7    | 3       | 47          | 48             | 111.47          | 58.24               | 7.14 %                  | 0.0894                                                   |                                                |                                                |
| 384           | 7    | 3       | 100         | 101            | 112.00          | 58.28               | 8.56 %                  | 0.1065                                                   |                                                |                                                |
| 384           | 7    | 4       | 1           | 2              | 112.51          | 58.31               | 7.16 %                  | 0.0885                                                   |                                                |                                                |
| 384           | 7    | 4       | 46          | 47             | 112.96          | 58.34               | 8.67 %                  | 0.1067                                                   |                                                |                                                |
| 384           | 7    | 4       | 100         | 101            | 113.50          | 58.38               | 6.40 %                  | 0.0804                                                   |                                                |                                                |
| 384           | 7    | 5       | 1           | 2              | 114.01          | 58.41               | 5.23 %                  | 0.0669                                                   |                                                |                                                |
| 384           | 7    | 5       | 50          | 51             | 114.50          | 58.44               | 6.64 %                  | 0.0864                                                   |                                                |                                                |
| 384           | 7    | 6       | 1           | 2              | 115.51          | 58.51               | 5.56 %                  | 0.0723                                                   |                                                |                                                |
| 384           | 7    | 6       | 50          | 51             | 116.00          | 58.54               | 6.62 %                  | 0.0859                                                   |                                                |                                                |
| 384           | 7    | 6       | 100         | 101            | 116.50          | 58.57               | 15.52 %                 | 0.1978                                                   |                                                |                                                |
| 384           | 8    | 1       | 100         | 101            | 118.30          | 58.69               | 9.68 %                  | 0.1150                                                   |                                                |                                                |
| 384           | 8    | 2       | 1           | 2              | 118.81          | 58.72               | 5.62 %                  | 0.0680                                                   |                                                |                                                |
| 384           | 8    | 2       | 50          | 51             | 119.30          | 58.75               | 8.06 %                  | 0.0993                                                   |                                                |                                                |
| 384           | 8    | 2       | 100         | 101            | 119.80          | 58.78               | 7.70 %                  | 0.0965                                                   |                                                |                                                |
| 384           | 8    | 2       | 138         | 139            | 120.18          | 58.81               | 4.15 %                  | 0.0527                                                   |                                                |                                                |
| 384           | 8    | 3       | 50          | 51             | 120.80          | 58.85               | 5.32 %                  | 0.0687                                                   |                                                |                                                |
| 384           | 8    | 3       | 100         | 101            | 121.30          | 58.88               | 7.95 %                  | 0.1049                                                   |                                                |                                                |
| 384           | 8    | 4       | 1           | 2              | 121.81          | 58.91               | 5.31 %                  | 0.0715                                                   |                                                |                                                |
| 384           | 8    | 4       | 55          | 56             | 122.35          | 58.95               | 9.17 %                  | 0.1261                                                   |                                                |                                                |
| 384           | 8    | 4       | 100         | 101            | 122.80          | 58.98               | 7.36 %                  | 0.0791                                                   |                                                |                                                |
| 384           | 8    | 5       | 1           | 2              | 123.31          | 59.02               | 5.15 %                  | 0.0533                                                   |                                                |                                                |
| 384           | 8    | 5       | 50          | 51             | 123.80          | 59.06               | 5.25 %                  | 0.0524                                                   |                                                |                                                |
| 384           | 8    | 5       | 100         | 101            | 124.30          | 59.10               | 8.84 %                  | 0.0885                                                   |                                                |                                                |
| 384           | 9    | 1       | 1           | 2              | 127.36          | 59.42               | 6.28 %                  | 0.0377                                                   |                                                |                                                |
| 384           | 9    | 1       | 50          | 51             | 127.85          | 59.49               | 7.24 %                  | 0.0436                                                   |                                                |                                                |

| Site/<br>Hole | Core | Section | Top<br>(cm) | Bottom<br>(cm) | Depth<br>(mbsf) | Revised<br>age (Ma) | wt%<br>SiO <sub>2</sub> | bioSiO <sub>2</sub><br>flux (g/<br>cm <sup>2</sup> /kyr) | Norm.<br>δ <sup>13</sup> C (‰<br>VPDB<br>mean) | Norm.<br>δ <sup>18</sup> O (‰<br>VPDB<br>mean) |
|---------------|------|---------|-------------|----------------|-----------------|---------------------|-------------------------|----------------------------------------------------------|------------------------------------------------|------------------------------------------------|
| 384           | 9    | 1       | 100         | 101            | 128.35          | 59.56               | 8.78 %                  | 0.0547                                                   |                                                |                                                |
| 384           | 9    | 2       | 1           | 2              | 128.86          | 59.62               | 7.41 %                  | 0.0478                                                   |                                                |                                                |
| 384           | 9    | 2       | 50          | 51             | 129.35          | 59.69               | 6.40 %                  | 0.0426                                                   |                                                |                                                |
| 384           | 9    | 2       | 103         | 104            | 129.88          | 59.76               | 3.50 %                  | 0.0241                                                   |                                                |                                                |
| 384           | 9    | 3       | 1           | 2              | 130.36          | 59.83               | 4.17 %                  | 0.0272                                                   |                                                |                                                |
| 384           | 9    | 3       | 50          | 51             | 130.85          | 59.89               | 7.73 %                  | 0.0477                                                   |                                                |                                                |
| 384           | 9    | 3       | 100         | 101            | 131.35          | 59.96               | 10.67 %                 | 0.0652                                                   |                                                |                                                |
| 384           | 9    | 4       | 1           | 2              | 131.86          | 60.03               | 9.86 %                  | 0.0596                                                   |                                                |                                                |
| 384           | 9    | 4       | 50          | 51             | 132.35          | 60.10               | 6.44 %                  | 0.0386                                                   |                                                |                                                |
| 384           | 9    | 4       | 100         | 101            | 132.85          | 60.16               | 6.23 %                  | 0.0376                                                   |                                                |                                                |
| 384           | 9    | 5       | 1           | 2              | 133.36          | 60.23               | 6.97 %                  | 0.0423                                                   |                                                |                                                |
| 384           | 9    | 5       | 50          | 51             | 133.85          | 60.30               | 7.60 %                  | 0.0465                                                   |                                                |                                                |
| 384           | 9    | 5       | 100         | 101            | 134.35          | 60.37               | 8.55 %                  | 0.0528                                                   |                                                |                                                |
| 384           | 9    | 6       | 1           | 2              | 134.86          | 60.44               | 7.62 %                  | 0.0475                                                   |                                                |                                                |
| 384           | 9    | 6       | 50          | 51             | 135.35          | 60.50               | 6.32 %                  | 0.0398                                                   |                                                |                                                |
| 384           | 9    | 6       | 100         | 101            | 135.85          | 60.57               | 6.69 %                  | 0.0412                                                   |                                                |                                                |
| 384           | 10   | 1       | 50          | 51             | 136.9           | 60.71               | 8.43 %                  | 0.0496                                                   |                                                |                                                |
| 384           | 10   | 1       | 100         | 101            | 137.40          | 60.78               | 11.91 %                 | 0.0707                                                   |                                                |                                                |
| 384           | 10   | 2       | 1           | 2              | 137.91          | 60.85               | 7.32 %                  | 0.0439                                                   |                                                |                                                |
| 384           | 10   | 2       | 50          | 51             | 138.40          | 60.92               | 10.00 %                 | 0.0605                                                   |                                                |                                                |
| 384           | 10   | 2       | 107         | 108            | 138.97          | 60.99               | 7.33 %                  | 0.0448                                                   |                                                |                                                |
| 384           | 10   | 3       | 1           | 2              | 139.41          | 61.05               | 8.20 %                  | 0.0497                                                   |                                                |                                                |
| 384           | 10   | 3       | 50          | 51             | 139.9           | 61.12               | 10.19 %                 | 0.0611                                                   |                                                |                                                |
| 384           | 10   | 3       | 100         | 101            | 140.40          | 61.19               | 7.51 %                  | 0.0446                                                   |                                                |                                                |
| 384           | 10   | 4       | 1           | 2              | 140.91          | 61.26               | 10.26 %                 | 0.0603                                                   |                                                |                                                |
| 384           | 10   | 4       | 50          | 51             | 141.4           | 61.32               | 12.95 %                 | 0.0754                                                   |                                                |                                                |
| 384           | 10   | 4       | 100         | 101            | 141.90          | 61.39               | 12.97 %                 | 0.0760                                                   |                                                |                                                |
| 384           | 10   | 5       | 1           | 2              | 142.41          | 61.46               | 11.80 %                 | 0.0696                                                   |                                                |                                                |
| 384           | 10   | 5       | 50          | 51             | 142.9           | 61.53               | 11.56 %                 | 0.0686                                                   |                                                |                                                |
| 384           | 10   | 5       | 100         | 101            | 143.40          | 61.59               | 9.37 %                  | 0.0559                                                   |                                                |                                                |
| 384           | 10   | 6       | 1           | 2              | 143.91          | 61.66               | 11.13 %                 | 0.0668                                                   |                                                |                                                |
| 384           | 10   | 6       | 50          | 51             | 144.4           | 61.73               | 12.04 %                 | 0.0726                                                   |                                                |                                                |
| 384           | 10   | 6       | 100         | 101            | 144.90          | 61.80               | 10.41 %                 | 0.0628                                                   |                                                |                                                |
| 384           | 11   | 1       | 50          | 51             | 146.2           | 61.97               | 9.88 %                  | 0.0596                                                   |                                                |                                                |
| 384           | 11   | 1       | 100         | 101            | 146.70          | 62.04               | 9.04 %                  | 0.0535                                                   |                                                |                                                |
| 384           | 11   | 2       | 1           | 2              | 147.21          | 62.11               | 9.56 %                  | 0.0556                                                   |                                                |                                                |

| Site/<br>Hole | Core | Section | Top<br>(cm) | Bottom<br>(cm) | Depth<br>(mbsf) | Revised<br>age (Ma) | wt%<br>SiO <sub>2</sub> | bioSiO <sub>2</sub><br>flux (g/<br>cm <sup>2</sup> /kyr) | Norm.<br>δ <sup>13</sup> C (‰<br>VPDB<br>mean) | Norm.<br>δ <sup>18</sup> O (‰<br>VPDB<br>mean) |
|---------------|------|---------|-------------|----------------|-----------------|---------------------|-------------------------|----------------------------------------------------------|------------------------------------------------|------------------------------------------------|
| 384           | 11   | 2       | 50          | 51             | 147.7           | 62.17               | 11.23 %                 | 0.0642                                                   |                                                |                                                |
| 384           | 11   | 2       | 100         | 101            | 148.20          | 62.24               | 13.18 %                 | 0.0989                                                   |                                                |                                                |
| 384           | 11   | 3       | 10          | 11             | 148.80          | 62.31               | 12.19 %                 | 0.1002                                                   |                                                |                                                |
| 384           | 11   | 3       | 50          | 51             | 149.2           | 62.35               | 11.27 %                 | 0.0981                                                   |                                                |                                                |
| 384           | 11   | 3       | 100         | 101            | 149.70          | 62.41               | 9.53 %                  | 0.0843                                                   |                                                |                                                |
| 384           | 11   | 4       | 1           | 2              | 150.21          | 62.46               | 10.93 %                 | 0.0585                                                   |                                                |                                                |
| 384           | 11   | 4       | 50          | 51             | 150.7           | 62.52               | 10.69 %                 | 0.0575                                                   |                                                |                                                |
| 384           | 11   | 4       | 100         | 101            | 151.20          | 62.60               | 10.64 %                 | 0.0694                                                   |                                                |                                                |
| 700B          | 25   | 1       | 38          | 39             | 228.88          | 55.38               | 5.71 %                  | 0.1389                                                   | 2.4534                                         | -0.5405                                        |
| 700B          | 26   | 1       | 36          | 37             | 238.36          | 56.29               | 3.51 %                  | 0.0730                                                   | 3.0325                                         | -0.3440                                        |
| 700B          | 26   | 1       | 46          | 47             | 238.46          | 56.29               | 5.32 %                  | 0.1106                                                   | 3.0187                                         | -0.5340                                        |
| 700B          | 26   | 1       | 49          | 50             | 238.49          | 56.30               | 4.18 %                  | 0.0868                                                   | 3.0995                                         | -0.4626                                        |
| 700B          | 26   | 1       | 50          | 51             | 238.5           | 56.30               | 6.87 %                  | 0.1426                                                   | 3.12                                           | -0.4800                                        |
| 700B          | 26   | 2       | 50          | 51             | 240             | 56.44               | 4.87 %                  | 0.0985                                                   | 3.2                                            | -0.6400                                        |
| 700B          | 26   | 2       | 100         | 101            | 240.5           | 56.49               | 5.92 %                  | 0.1185                                                   | 3.2961                                         | -0.4891                                        |
| 700B          | 26   | 3       | 40          | 41             | 241.4           | 56.57               | 7.36 %                  | 0.1488                                                   | 3.4                                            | -0.3400                                        |
| 700B          | 27   | 1       | 60          | 61             | 248.1           | 57.21               | 8.22 %                  | 0.1799                                                   | 3.3600                                         | -0.2600                                        |
| 700B          | 27   | 2       | 20          | 21             | 249.2           | 57.32               | 4.85 %                  | 0.1048                                                   | 3.4371                                         | -0.1975                                        |
| 700B          | 28   | 1       | 1           | 2              | 257.01          | 58.06               | 6.82 %                  | 0.1246                                                   | 4.1172                                         | -0.0229                                        |
| 700B          | 28   | 1       | 50          | 51             | 257.5           | 58.10               | 6.39 %                  | 0.1154                                                   | 4.1                                            | -0.4200                                        |
| 700B          | 28   | 1       | 100         | 101            | 258             | 58.15               | 5.10 %                  | 0.0911                                                   | 4.1800                                         | -0.1300                                        |
| 700B          | 28   | 1       | 130         | 131            | 258.3           | 58.18               | 8.57 %                  | 0.1534                                                   | 4.4                                            | -0.2500                                        |
| 700B          | 28   | 2       | 1           | 2              | 258.51          | 58.20               | 4.29 %                  | 0.0783                                                   | 3.9900                                         | -0.4100                                        |
| 700B          | 28   | 2       | 50          | 51             | 259             | 58.25               | 3.36 %                  | 0.0642                                                   | 4.1702                                         | -0.1171                                        |
| 700B          | 28   | 2       | 100         | 101            | 259.5           | 58.29               | 3.26 %                  | 0.0649                                                   | 3.0000                                         | -0.5500                                        |
| 700B          | 28   | 3       | 1           | 2              | 260.01          | 58.34               | 6.19 %                  | 0.0852                                                   | 4.1                                            | -0.1600                                        |
| 700B          | 28   | 3       | 50          | 51             | 260.5           | 58.39               | 11.74 %                 | 0.1054                                                   | 3.6141                                         | -0.2153                                        |
| 700B          | 28   | 3       | 100         | 101            | 261             | 58.44               | 7.61 %                  | 0.0731                                                   | 3.4                                            | -0.3000                                        |
| 700B          | 28   | 4       | 1           | 2              | 261.51          | 58.49               | 9.04 %                  | 0.0927                                                   | 3.6700                                         | -0.0300                                        |
| 700B          | 28   | 4       | 50          | 51             | 262             | 58.53               | 9.42 %                  | 0.1024                                                   | 3.4181                                         | 0.0972                                         |
| 700B          | 28   | 4       | 100         | 101            | 262.5           | 58.58               | 11.41 %                 | 0.1311                                                   | 3.5700                                         | -0.1100                                        |
| 700B          | 28   | 4       | 145         | 146            | 262.95          | 58.62               | 6.63 %                  | 0.0801                                                   | 3.6100                                         | -0.1200                                        |
| 700B          | 29   | 1       | 50          | 51             | 267             | 59.01               | 6.60 %                  | 0.1135                                                   | 3.4111                                         | -0.1389                                        |
| 700B          | 29   | 2       | 30          | 31             | 268.3           | 59.14               | 5.25 %                  | 0.0891                                                   | 3.4300                                         | -0.0500                                        |
| 700B          | 29   | 2       | 100         | 101            | 269             | 59.21               | 5.94 %                  | 0.1013                                                   | 3.1                                            | -0.0200                                        |
| 700B          | 30   | 1       | 11          | 12             | 276.11          | 59.92               | 7.65 %                  | 0.1280                                                   | 3.0201                                         | -0.1191                                        |

| Site/<br>Hole | Core | Section | Top<br>(cm) | Bottom<br>(cm) | Depth<br>(mbsf) | Revised<br>age (Ma) | wt%<br>SiO <sub>2</sub> | bioSiO <sub>2</sub><br>flux (g/<br>cm <sup>2</sup> /kyr) | Norm.<br>δ <sup>13</sup> C (‰<br>VPDB<br>mean) | Norm.<br>δ <sup>18</sup> O (‰<br>VPDB<br>mean) |
|---------------|------|---------|-------------|----------------|-----------------|---------------------|-------------------------|----------------------------------------------------------|------------------------------------------------|------------------------------------------------|
| 700B          | 30   | 1       | 68          | 69             | 276.68          | 59.98               | 8.44 %                  | 0.1410                                                   | 2.9500                                         | -0.1400                                        |
| 700B          | 30   | 1       | 79          | 80             | 276.79          | 59.99               | 9.14 %                  | 0.1521                                                   | 2.9300                                         | -0.3500                                        |
| 700B          | 30   | 1       | 100         | 101            | 277             | 60.01               | 7.30 %                  | 0.1215                                                   | 3.1221                                         | 0.0456                                         |
| 700B          | 30   | 1       | 111         | 112            | 277.11          | 60.02               | 8.91 %                  | 0.1482                                                   | 3.0327                                         | -0.1074                                        |
| 700B          | 30   | 1       | 121         | 122            | 277.21          | 60.03               | 9.01 %                  | 0.1498                                                   | 3.0925                                         | 0.0255                                         |
| 700B          | 30   | 1       | 135         | 136            | 277.35          | 60.05               | 7.16 %                  | 0.1190                                                   | 3.1311                                         | 0.0873                                         |
| 700B          | 30   | 1       | 145         | 146            | 277.45          | 60.06               | 7.47 %                  | 0.1242                                                   | 3.0437                                         | 0.0781                                         |
| 700B          | 30   | 2       | 5           | 6              | 277.55          | 60.07               | 9.32 %                  | 0.1549                                                   | 3.0847                                         | 0.0652                                         |
| 700B          | 30   | 2       | 25          | 26             | 277.75          | 60.09               | 9.26 %                  | 0.1537                                                   | 3.0481                                         | 0.0238                                         |
| 700B          | 30   | 2       | 69          | 70             | 278.19          | 60.13               | 5.63 %                  | 0.0934                                                   | 2.9505                                         | -0.4100                                        |
| 700B          | 30   | 2       | 120         | 121            | 278.7           | 60.18               | 7.89 %                  | 0.1304                                                   | 3.0645                                         | -0.1491                                        |
| 700B          | 30   | 2       | 140         | 141            | 278.9           | 60.20               | 8.83 %                  | 0.1453                                                   | 3.0261                                         | -0.0953                                        |
| 700B          | 30   | 3       | 5           | 6              | 279.05          | 60.22               | 7.83 %                  | 0.1285                                                   | 3.7                                            | -0.3187                                        |
| 700B          | 30   | 3       | 26          | 27             | 279.26          | 60.24               | 6.62 %                  | 0.1082                                                   | 2.9837                                         | -0.3951                                        |
| 700B          | 30   | 3       | 43          | 44             | 279.43          | 60.26               | 9.16 %                  | 0.1491                                                   | 3.0311                                         | -0.3473                                        |
| 700B          | 30   | 3       | 65          | 66             | 279.65          | 60.28               | 7.73 %                  | 0.1253                                                   | 3.0237                                         | -0.2731                                        |
| 700B          | 30   | 3       | 83          | 84             | 279.83          | 60.30               | 9.07 %                  | 0.1466                                                   | 3.1225                                         | -0.2831                                        |
| 700B          | 30   | 3       | 95          | 96             | 279.95          | 60.31               | 10.19 %                 | 0.1642                                                   | 3.1321                                         | -0.1274                                        |
| 700B          | 30   | 3       | 105         | 106            | 280.05          | 60.32               | 12.21 %                 | 0.1967                                                   | 3.0747                                         | -0.1451                                        |
| 700B          | 30   | 3       | 115         | 116            | 280.15          | 60.33               | 8.62 %                  | 0.1399                                                   | 3.0457                                         | -0.1520                                        |
| 700B          | 30   | 3       | 139         | 140            | 280.39          | 60.35               | 10.78 %                 | 0.1776                                                   | 3.0441                                         | -0.1320                                        |
| 700B          | 30   | 4       | 50          | 51             | 281             | 60.41               | 10.80 %                 | 0.1850                                                   | 3.0725                                         | -0.3733                                        |
| 700B          | 30   | 5       | 50          | 51             | 282.5           | 60.56               | 8.01 %                  | 0.1338                                                   | 2.8437                                         | -0.6818                                        |
| 700B          | 30   | 6       | 50          | 51             | 284             | 60.72               | 6.07 %                  | 0.0999                                                   | 2.8480                                         | -0.6390                                        |
| 700B          | 31   | 1       | 1           | 2              | 285.51          | 60.87               | 5.46 %                  | 0.0931                                                   | 3.0327                                         | -0.2691                                        |
| 700B          | 31   | 1       | 50          | 51             | 286             | 60.92               | 8.08 %                  | 0.1391                                                   | 2.8580                                         | -0.2262                                        |
| 700B          | 31   | 1       | 100         | 101            | 286.5           | 60.97               | 8.44 %                  | 0.1486                                                   | 3.0031                                         | -0.2897                                        |
| 700B          | 31   | 1       | 145         | 146            | 286.95          | 61.02               | 5.72 %                  | 0.1035                                                   | 2.9414                                         | -0.4234                                        |
| 700B          | 31   | 2       | 1           | 2              | 287.01          | 61.02               | 6.83 %                  | 0.1241                                                   | 2.9337                                         | -0.5211                                        |
| 700B          | 31   | 2       | 50          | 51             | 287.5           | 61.07               | 7.02 %                  | 0.1313                                                   | 2.9701                                         | -0.3245                                        |
| 700B          | 31   | 2       | 100         | 101            | 288             | 61.12               | 8.02 %                  | 0.1543                                                   | 2.9044                                         | -0.5930                                        |
| 700B          | 31   | 2       | 145         | 146            | 288.45          | 61.17               | 8.01 %                  | 0.1498                                                   | 2.9924                                         | -0.4899                                        |
| 700B          | 31   | 3       | 1           | 2              | 288.51          | 61.17               | 5.58 %                  | 0.1040                                                   | 2.9100                                         | -0.4498                                        |
| 700B          | 31   | 3       | 19          | 20             | 288.69          | 61.19               | 8.79 %                  | 0.1615                                                   | 2.8564                                         | -0.4745                                        |
| 700B          | 31   | 3       | 70          | 71             | 289.2           | 61.24               | 9.29 %                  | 0.1641                                                   | 2.8214                                         | -0.5271                                        |
| 700B          | 31   | 3       | 100         | 101            | 289.5           | 61.27               | 7.31 %                  | 0.1262                                                   | 2.9330                                         | -0.3493                                        |



| Site/<br>Hole | Core | Section | Top<br>(cm) | Bottom<br>(cm) | Depth<br>(mbsf) | Revised<br>age (Ma) | wt%<br>SiO <sub>2</sub> | bioSiO <sub>2</sub><br>flux (g/<br>cm <sup>2</sup> /kyr) | Norm.<br>δ <sup>13</sup> C (‰<br>VPDB<br>mean) | Norm.<br>δ <sup>18</sup> O (‰<br>VPDB<br>mean) |
|---------------|------|---------|-------------|----------------|-----------------|---------------------|-------------------------|----------------------------------------------------------|------------------------------------------------|------------------------------------------------|
| 700B          | 31   | 4       | 1           | 2              | 290.01          | 61.32               | 8.92 %                  | 0.1516                                                   | 2.7527                                         | -0.6739                                        |
| 700B          | 31   | 4       | 50          | 51             | 290.5           | 61.37               | 11.10 %                 | 0.1860                                                   | 2.6954                                         | -0.2771                                        |
| 700B          | 31   | 4       | 100         | 101            | 291             | 61.42               | 11.48 %                 | 0.1903                                                   | 2.5400                                         | -0.2858                                        |
| 700B          | 31   | 5       | 1           | 2              | 291.51          | 61.47               | 11.84 %                 | 0.1957                                                   | 2.2400                                         | -0.7300                                        |
| 700B          | 31   | 5       | 50          | 51             | 292             | 61.52               | 10.28 %                 | 0.1697                                                   | 2.2800                                         | -0.6700                                        |
| 700B          | 31   | 5       | 100         | 101            | 292.5           | 61.57               | 11.99 %                 | 0.1974                                                   | 2.2379                                         | -0.7504                                        |
| 700B          | 31   | 6       | 1           | 2              | 293.01          | 61.62               | 11.29 %                 | 0.1981                                                   | 2.3600                                         | -0.6300                                        |
| 700B          | 31   | 6       | 33          | 34             | 293.33          | 61.66               | 12.79 %                 | 0.2313                                                   | 2.4500                                         | -1.1200                                        |
| 700B          | 31   | 6       | 63,5        | 64,5           | 293.635         | 61.69               | 8.50 %                  | 0.1581                                                   | 2.4570                                         | -0.7808                                        |
| 700B          | 31   | 6       | 100         | 101            | 294             | 61.72               | 8.66 %                  | 0.1665                                                   | 2.2900                                         | -0.7500                                        |
| 700B          | 31   | 6       | 145         | 146            | 294.45          | 61.77               | 14.36 %                 | 0.2642                                                   | 2.2200                                         | -0.7900                                        |
| 700B          | 31   | 7       | 20          | 21             | 294.7           | 61.79               | 9.70 %                  | 0.1741                                                   | 2.2149                                         | -0.6925                                        |
| 700B          | 31   | 7       | 50          | 51             | 295             | 61.82               | 8.45 %                  | 0.1496                                                   | 2.9                                            | -0.9600                                        |
| 700B          | 31   | 8       | 13          | 14             | 295.26          | 61.85               | 10.59 %                 | 0.1867                                                   | 2.2300                                         | -1.2200                                        |
| 700B          | 32   | 1       | 50          | 51             | 295.5           | 61.87               | 8.27 %                  | 0.1451                                                   | 2.1469                                         | -0.8423                                        |
| 700B          | 32   | 2       | 50          | 51             | 297             | 62.02               | 6.75 %                  | 0.1226                                                   | 2.2900                                         | -0.5700                                        |
| 700B          | 32   | 3       | 50          | 51             | 298.5           | 62.17               | 9.86 %                  | 0.1816                                                   | 2.2200                                         | -0.8300                                        |
| 700B          | 32   | 4       | 50          | 51             | 300             | 62.32               | 9.89 %                  | 0.1792                                                   | 2.6020                                         | -0.5120                                        |
| 700B          | 32   | 5       | 50          | 51             | 301.5           | 62.47               | 8.75 %                  | 0.1677                                                   | 2.3500                                         | -0.4400                                        |
| 700B          | 32   | 6       | 50          | 51             | 303             | 62.62               | 3.92 %                  | 0.1917                                                   | 2.6400                                         | -0.3100                                        |
| 700B          | 33   | 1       | 1           | 2              | 304.51          | 62.77               | 5.30 %                  | 0.0998                                                   | 3.0081                                         | -0.3612                                        |
| 700B          | 33   | 1       | 50          | 51             | 305             | 62.82               | 3.73 %                  | 0.1630                                                   | 2.5700                                         | -0.4286                                        |
| 700B          | 33   | 1       | 100         | 101            | 305.5           | 62.86               | 5.85 %                  | 0.1080                                                   | 2.6690                                         | -0.8076                                        |
| 700B          | 34   | 1       | 75          | 76             | 314.75          | 63.78               | 9.78 %                  | 0.0695                                                   | 2.1909                                         | -1.5646                                        |
| 700B          | 34   | 1       | 119         | 120            | 315.19          | 63.83               | 9.10 %                  | 0.1686                                                   | 2.12                                           | -1.5700                                        |
| 700B          | 34   | 2       | 19          | 20             | 315.69          | 63.88               | 8.22 %                  | 0.1595                                                   | 1.9300                                         | -1.5300                                        |
| 700B          | 34   | 2       | 100         | 101            | 316.5           | 63.96               | 8.39 %                  | 0.1737                                                   | 2.4270                                         | -0.9812                                        |
| 700B          | 34   | 3       | 15          | 16             | 317.15          | 64.02               | 7.53 %                  | 0.1586                                                   | 2.3400                                         | -1.2300                                        |
| 700B          | 34   | 3       | 100         | 101            | 318             | 64.11               | 7.00 %                  | 0.1508                                                   | 2.4700                                         | -1.1800                                        |
| 752A          | 14   | 3       | 63          | 65             | 126.24          | 51.02               | 6.04 %                  | 0.0966                                                   | 0.5327                                         | -0.9846                                        |
| 752A          | 15   | 1       | 121         | 122            | 133.51          | 51.60               | 12.36 %                 | 0.1978                                                   | 0.5200                                         | -1.0400                                        |
| 752A          | 15   | 4       | 62          | 64             | 137.43          | 51.92               | 6.27 %                  | 0.1079                                                   | 0.9077                                         | -0.8417                                        |
| 752A          | 16   | 2       | 120         | 121            | 144.7           | 52.50               | 15.67 %                 | 0.2567                                                   | 0.2700                                         | -1.2400                                        |
| 752A          | 16   | 5       | 25          | 27             | 149.76          | 52.90               | 3.95 %                  | 0.0673                                                   | 0.9577                                         | -0.8953                                        |
| 752A          | 17   | 2       | 120         | 122            | 154.41          | 53.28               | 6.89 %                  | 0.1161                                                   | 1.1108                                         | -0.9776                                        |
| 752A          | 18   | 2       | 10          | 12             | 163.01          | 53.97               | 5.29 %                  | 0.0861                                                   | 1.3265                                         | -0.9041                                        |

| Site/<br>Hole | Core | Section | Top<br>(cm) | Bottom<br>(cm) | Depth<br>(mbsf) | Revised<br>age (Ma) | wt%<br>SiO <sub>2</sub> | bioSiO <sub>2</sub><br>flux (g/<br>cm <sup>2</sup> /kyr) | Norm.<br>δ <sup>13</sup> C (‰<br>VPDB<br>mean) | Norm.<br>δ <sup>18</sup> O (‰<br>VPDB<br>mean) |
|---------------|------|---------|-------------|----------------|-----------------|---------------------|-------------------------|----------------------------------------------------------|------------------------------------------------|------------------------------------------------|
| 752A          | 19   | 1       | 120         | 122            | 172.26          | 54.71               | 11.62 %                 | 0.1745                                                   | 1.5679                                         | -0.8582                                        |
| 752A          | 19   | 2       | 62          | 64             | 173.23          | 54.79               | 14.92 %                 | 0.2167                                                   | 1.5363                                         | -0.9755                                        |
| 752A          | 19   | cc      | 28          | 29             | 177.08          | 55.10               | 14.45 %                 | 0.1993                                                   | 2.0593                                         | -0.8936                                        |
| 752A          | 20   | 1       | 30          | 31             | 181             | 55.41               | 6.43 %                  | 0.1083                                                   | 2.2477                                         | -0.7935                                        |
| 752A          | 20   | 1       | 61          | 62             | 181.31          | 55.43               | 8.51 %                  | 0.1437                                                   | 2.1531                                         | -1.0255                                        |
| 752A          | 20   | 1       | 81          | 82             | 181.51          | 55.45               | 5.38 %                  | 0.0910                                                   | 2.4224                                         | -0.9742                                        |
| 752A          | 20   | 1       | 101         | 102            | 181.71          | 55.47               | 4.37 %                  | 0.0740                                                   | 2.4043                                         | -0.9334                                        |
| 752A          | 20   | 1       | 121         | 122            | 181.91          | 55.48               | 13.01 %                 | 0.2206                                                   | 2.6436                                         | -0.6927                                        |
| 752A          | 20   | cc      | 17          | 18             | 182.37          | 55.52               | 4.54 %                  | 0.0771                                                   | 3.0663                                         | -0.8797                                        |
| 752A          | 21   | 1       | 101         | 102            | 191.41          | 56.26               | 5.51 %                  | 0.0965                                                   | 2.5491                                         | -0.7511                                        |
| 752A          | 21   | 2       | 100         | 102            | 192.91          | 56.38               | 4.22 %                  | 0.0641                                                   | 2.9040                                         | -0.9951                                        |
| 752A          | 22   | 2       | 119         | 120            | 202.79          | 57.18               | 3.27 %                  | 0.0636                                                   | 3.2721                                         | -0.7788                                        |
| 752A          | 22   | 4       | 16          | 17             | 204.76          | 57.34               | 6.77 %                  | 0.1307                                                   | 3.5900                                         | -0.6500                                        |
| 752A          | 23   | 1       | 118         | 120            | 210.99          | 57.84               | 5.13 %                  | 0.0954                                                   | 3.3935                                         | -0.2706                                        |
| 752A          | 23   | cc      | 10          | 11             | 211.7           | 57.90               | 7.62 %                  | 0.1412                                                   | 3.6504                                         | -0.7181                                        |
| 752A          | 24   | 1       | 15          | 16             | 219.65          | 58.55               | 15.44 %                 | 0.3336                                                   | 3.3025                                         | -0.5807                                        |
| 752A          | 24   | 1       | 47          | 48             | 219.97          | 58.57               | 13.81 %                 | 0.2848                                                   | 3.3255                                         | -0.6397                                        |
| 752A          | 24   | 1       | 60          | 61             | 220.10          | 58.58               | 15.51 %                 | 0.3076                                                   | 3.3305                                         | -0.6442                                        |
| 752A          | 24   | 1       | 80          | 81             | 220.30          | 58.60               | 18.12 %                 | 0.3369                                                   | 3.3175                                         | -0.7116                                        |
| 752A          | 24   | 1       | 99          | 101            | 220.49          | 58.61               | 21.66 %                 | 0.5233                                                   | 3.2202                                         | -0.9525                                        |
| 752A          | 24   | 2       | 97          | 99             | 221.98          | 58.70               | 10.12 %                 | 0.1655                                                   | 3.2005                                         | -0.8480                                        |
| 752A          | 25   | 2       | 54          | 56             | 226.15          | 58.94               | 9.00 %                  | 0.1548                                                   | 3.1867                                         | -0.7285                                        |
| 752A          | 25   | 1       | 122         | 123            | 230.32          | 59.18               | 8.97 %                  | 0.1895                                                   | 3.2692                                         | -0.7474                                        |
| 752A          | 26   | 2       | 124         | 125            | 241.54          | 59.75               | 16.50 %                 | 0.3476                                                   | 2.6517                                         | -0.8240                                        |
| 752A          | 26   | 5       | 120         | 121            | 246             | 59.97               | 19.48 %                 | 0.4218                                                   | 2.5926                                         | -0.6815                                        |
| 752A          | 27   | 1       | 129         | 130            | 249.69          | 60.16               | 14.30 %                 | 0.3382                                                   | 2.7080                                         | -0.8876                                        |
| 752A          | 27   | 3       | 128         | 130            | 252.68          | 60.31               | 16.78 %                 | 0.4265                                                   | 2.6412                                         | -0.6114                                        |
| 752A          | 28   | 2       | 116         | 117            | 260.76          | 60.72               | 10.84 %                 | 0.2817                                                   | 2.7093                                         | -0.9615                                        |
| 752A          | 28   | 5       | 117         | 118            | 265.27          | 60.94               | 11.45 %                 | 0.3080                                                   | 2.9325                                         | -0.6795                                        |
| 752A          | 29   | 3       | 61          | 63             | 271.32          | 61.25               | 9.68 %                  | 0.2452                                                   | 2.8500                                         | -0.8036                                        |
| 752A          | 33   | 3       | 115         | 116            | 302.55          | 62.83               | 5.73 %                  | 0.3482                                                   | 2.0816                                         | -1.0539                                        |
| 752A          | 33   | 4       | 20          | 21             | 303.10          | 62.86               | 9.72 %                  | 0.5973                                                   | 2.1043                                         | -0.9561                                        |
| 752A          | 33   | 4       | 50          | 51             | 303.40          | 62.88               | 7.91 %                  | 0.4887                                                   | 2.1626                                         | -1.0926                                        |
| 752A          | 33   | 4       | 54          | 55             | 303.44          | 62.88               | 8.81 %                  | 0.5448                                                   | 2.1673                                         | -1.1040                                        |
| 752A          | 33   | CC      | 8           | 9              | 303.72          | 62.89               | 6.00 %                  | 0.3734                                                   | 2.2064                                         | -0.9621                                        |
| 752A          | 33   | CC      | 10          | 11             | 303.74          | 62.89               | 7.42 %                  | 0.4617                                                   | 2.2174                                         | -1.0196                                        |

| Site/<br>Hole | Core | Section | Top<br>(cm) | Bottom<br>(cm) | Depth<br>(mbsf) | Revised<br>age (Ma) | wt%<br>SiO <sub>2</sub> | <sup>bio</sup> SiO <sub>2</sub><br>flux (g/<br>cm <sup>2</sup> /kyr) | Norm.<br>δ <sup>13</sup> C (‰<br>VPDB<br>mean) | Norm.<br>δ <sup>18</sup> O (‰<br>VPDB<br>mean) |
|---------------|------|---------|-------------|----------------|-----------------|---------------------|-------------------------|----------------------------------------------------------------------|------------------------------------------------|------------------------------------------------|
| 1121B         | 6    | 1       | 85          | 86             | 33.55           | 57.36               | 14.10 %                 | 0.1615                                                               | 3.2645                                         | 0.6108                                         |
| 1121B         | 6    | 2       | 70          | 71             | 34.9            | 57.42               | 24.60 %                 | 0.2744                                                               |                                                |                                                |
| 1121B         | 7    | 1       | 100         | 101            | 43.3            | 57.77               | 33.65 %                 | 0.2850                                                               | 3.2497                                         | 0.3778                                         |
| 1121B         | 7    | 3       | 116         | 117            | 46.46           | 57.90               | 26.69 %                 | 0.2611                                                               | 3.3478                                         | 0.4800                                         |
| 1121B         | 7    | 5       | 120         | 121            | 49.5            | 58.03               | 19.28 %                 | 0.2180                                                               | 3.1337                                         | 0.3927                                         |
| 1121B         | 8    | 1       | 86          | 87             | 52.86           | 58.16               | 22.86 %                 | 0.2488                                                               | 3.0495                                         | 0.3644                                         |
| 1121B         | 8    | 3       | 116         | 117            | 56.16           | 58.30               | 30.78 %                 | 0.2676                                                               | 3.0485                                         | 0.4074                                         |
| 1121B         | 8    | 5       | 94          | 95             | 58.94           | 58.42               | 50.19 %                 | 0.4092                                                               |                                                |                                                |
| 1121B         | 9    | 1       | 66          | 67             | 62.26           | 58.55               | 30.29 %                 | 0.3359                                                               | 3.2700                                         | 0.4510                                         |
| 1121B         | 9    | 3       | 91          | 93             | 65.51           | 58.68               | 29.13 %                 | 0.2749                                                               | 3.2207                                         | 0.4075                                         |
| 1121B         | 9    | 5       | 83          | 84             | 68.43           | 58.80               | 33.87 %                 | 0.3356                                                               | 2.9497                                         | 0.4036                                         |
| 1121B         | 10   | 1       | 107         | 108            | 72.27           | 58.96               | 36.42 %                 | 0.3420                                                               | 3.3188                                         | 0.3877                                         |
| 1121B         | 10   | 2       | 110         | 111            | 73.8            | 59.02               | 28.49 %                 | 0.2433                                                               | 3.3308                                         | 0.5633                                         |
| 1121B         | 10   | 3       | 115         | 116            | 74.35           | 59.05               | 43.34 %                 | 0.3881                                                               |                                                |                                                |
| 1121B         | 10   | 4       | 50          | 51             | 75.99           | 59.11               | 24.81 %                 | 0.2283                                                               | 2.9205                                         | 0.6049                                         |
| 1121B         | 11   | 1       | 135         | 136            | 82.25           | 59.39               | 29.08 %                 | 0.1795                                                               | 3.2535                                         | 0.2775                                         |
| 1121B         | 11   | 1       | 145         | 146            | 82.35           | 59.39               | 32.33 %                 | 0.2007                                                               | 3.2595                                         | 0.2259                                         |
| 1121B         | 11   | 2       | 21          | 22             | 82.61           | 59.41               | 31.67 %                 | 0.1853                                                               | 3.2497                                         | 0.2210                                         |
| 1121B         | 11   | 2       | 52          | 53             | 82.92           | 59.43               | 29.79 %                 | 0.1656                                                               | 3.1885                                         | 0.1693                                         |
| 1121B         | 11   | 2       | 80          | 81             | 83.2            | 59.45               | 31.38 %                 | 0.1807                                                               |                                                |                                                |
| 1121B         | 11   | 2       | 110         | 111            | 83.5            | 59.47               | 29.57 %                 | 0.1711                                                               | 3.1615                                         | 0.3697                                         |
| 1121B         | 11   | 2       | 140         | 141            | 83.8            | 59.49               | 30.93 %                 | 0.1863                                                               | 3.2715                                         | 0.3549                                         |
| 1121B         | 11   | 3       | 11          | 12             | 84.01           | 59.51               | 31.65 %                 | 0.1995                                                               | 3.2355                                         | 0.4114                                         |
| 1121B         | 11   | 3       | 35          | 36             | 84.25           | 59.52               | 33.02 %                 | 0.2066                                                               | 3.2595                                         | 0.4372                                         |
| 1121B         | 11   | 3       | 59          | 60             | 84.49           | 59.54               | 36.43 %                 | 0.2176                                                               | 3.2325                                         | 0.3886                                         |
| 1121B         | 11   | 3       | 83          | 84             | 84.73           | 59.56               | 37.86 %                 | 0.2234                                                               | 3.2275                                         | 0.3648                                         |
| 1121B         | 11   | 3       | 110         | 111            | 85.0            | 59.57               | 29.77 %                 | 0.1751                                                               | 3.1805                                         | 0.3455                                         |
| 1121B         | 11   | 3       | 140         | 141            | 85.3            | 59.60               | 32.41 %                 | 0.1884                                                               | 3.2605                                         | 0.2874                                         |
| 1121B         | 11   | 4       | 18          | 19             | 85.58           | 59.61               | 33.21 %                 | 0.1952                                                               | 3.2435                                         | 0.2328                                         |
| 1121B         | 11   | 4       | 55          | 56             | 85.95           | 59.64               | 27.39 %                 | 0.1715                                                               | 3.2017                                         | 0.1803                                         |
| 1121B         | 11   | 4       | 90          | 91             | 86.3            | 59.66               | 29.85 %                 | 0.1886                                                               | 3.2005                                         | 0.0969                                         |
| 1121B         | 11   | 4       | 94          | 95             | 86.34           | 59.67               | 31.73 %                 | 0.2011                                                               | 3.2215                                         | 0.3539                                         |
| 1121B         | 11   | 4       | 110         | 111            | 86.5            | 59.68               | 32.01 %                 | 0.2003                                                               | 3.2938                                         | 0.2825                                         |
| 1121B         | 11   | 4       | 125         | 126            | 86.65           | 59.69               | 32.38 %                 | 0.2068                                                               | 3.2327                                         | 0.0950                                         |
| 1121B         | 11   | 4       | 140         | 141            | 86.8            | 59.70               | 31.37 %                 | 0.2022                                                               | 3.2275                                         | 0.2503                                         |
| 1121B         | 11   | 5       | 5           | 6              | 86.95           | 59.71               | 27.82 %                 | 0.1804                                                               | 3.2217                                         | 0.2984                                         |

| Site/<br>Hole | Core | Section | Top<br>(cm) | Bottom<br>(cm) | Depth<br>(mbsf) | Revised<br>age (Ma) | wt%<br>SiO <sub>2</sub> | bioSiO <sub>2</sub><br>flux (g/<br>cm <sup>2</sup> /kyr) | Norm.<br>δ <sup>13</sup> C (‰<br>VPDB<br>mean) | Norm.<br>δ <sup>18</sup> O (‰<br>VPDB<br>mean) |
|---------------|------|---------|-------------|----------------|-----------------|---------------------|-------------------------|----------------------------------------------------------|------------------------------------------------|------------------------------------------------|
| 1121B         | 11   | 5       | 10          | 11             | 87              | 59.71               | 30.95 %                 | 0.2012                                                   | 3.2817                                         | 0.3014                                         |
| 1121B         | 11   | 5       | 10          | 11             | 87.0            | 59.71               | 23.96 %                 | 0.1557                                                   | 3.1997                                         | 0.2865                                         |
| 1121B         | 11   | 5       | 15          | 16             | 87.05           | 59.72               | 39.66 %                 | 0.2583                                                   | 3.2848                                         | 0.2528                                         |
| 1121B         | 11   | 5       | 20          | 21             | 87.1            | 59.72               | 27.85 %                 | 0.1818                                                   | 3.2797                                         | 0.2805                                         |
| 1121B         | 12   | 1       | 10          | 11             | 90.51           | 59.96               | 38.57 %                 | 0.2871                                                   | 2.9667                                         | 0.1913                                         |
| 1121B         | 12   | 1       | 100         | 101            | 91.5            | 60.03               | 29.49 %                 | 0.2273                                                   | 3.0275                                         | 0.1991                                         |
| 1121B         | 12   | 2       | 100         | 101            | 93.0            | 60.13               | 37.30 %                 | 0.3025                                                   | 2.9045                                         | 0.0195                                         |
| 1121B         | 12   | 3       | 40          | 41             | 93.9            | 60.20               | 9.79 %                  | 0.0818                                                   | 2.9057                                         | 0.1863                                         |
| 1121B         | 13   | CC      | 10          | 11             | 100.2           | 60.64               | 9.15 %                  | 0.0919                                                   | 2.8544                                         | 0.2830                                         |
| 1121B         | 13   | CC      | 20          | 22             | 100.3           | 60.65               | 19.82 %                 | 0.1997                                                   | 2.8507                                         | 0.2627                                         |
| 1121B         | 14   | CC      | 8           | 10             | 109.78          | 61.32               | 28.13 %                 | 0.3550                                                   | 2.8067                                         | 0.2051                                         |
| 1121B         | 14   | CC      | 10          | 11             | 109.8           | 61.32               | 32.37 %                 | 0.4087                                                   | 2.8464                                         | 0.1118                                         |
| 1121B         | 14   | CC      | 11          | 13             | 109.81          | 61.32               | 31.38 %                 | 0.3962                                                   | 2.6477                                         | 0.0553                                         |
| 1121B         | 14   | CC      | 30          | 32             | 110             | 61.33               | 46.23 %                 | 0.5862                                                   | 2.6624                                         | 0.3906                                         |
| 1121B         | 14   | CC      | 43          | 45             | 110.13          | 61.34               | 40.28 %                 | 0.5121                                                   | 2.6364                                         | 0.4184                                         |
| 1121B         | 15   | 1       | 100         | 101            | 120.4           | 62.06               | 29.91 %                 | 0.4628                                                   | 2.8444                                         | -0.1412                                        |

**Table S2.** Microfossil content pre-, mid- and post-silica extraction for 10 selected samples.

| Site/<br>Hole | Sample                      | Pre-silica extraction content                                                                                                                                    | Mid-silica<br>extraction<br>content | Post-silica<br>extraction<br>content |
|---------------|-----------------------------|------------------------------------------------------------------------------------------------------------------------------------------------------------------|-------------------------------------|--------------------------------------|
| 208           | 21-208-30R-5<br>-101_102    | Dominance of diatoms with <i>S. turris</i> complex, Hemiauloids and pennates. Numerous sponge spicules, common radiolarians and few silicoflagellates            | /                                   | /                                    |
| 208           | 21-208-30R-6<br>-15_16      | Dominance of radiolarians. Diatoms are mainly <i>S. turris</i> complex, Hemiauloids, pennates and tripolar forms. Few sponge spicules and rare silicoflagellates | /                                   | /                                    |
| 384           | 43-384-11R-2<br>-100_101    | Numerous fragments of radiolarians and silicoflagellates. Few sponge spicules                                                                                    | /                                   | /                                    |
| 384           | 43-384-8R-5-<br>100_101     | Dominance of radiolarians, silicoflagellates and sponge spicules. Few diatoms                                                                                    | /                                   | /                                    |
| 700B          | 114-700B-32<br>R-3-50_51    | Dominance of radiolarian fragments                                                                                                                               | /                                   | /                                    |
| 700B          | 114-700B-29<br>R-1-50_51    | Few diatoms, radiolarians and silicoflagellates                                                                                                                  | /                                   | /                                    |
| 752A          | 121-752A-24<br>X-1-99_100   | Dominance of diatoms with centric and tripolar forms. Few sponge spicules, radiolarians and silicoflagellates                                                    | /                                   | /                                    |
| 752A          | 121-752A-25<br>X-1-122_123  | Dominance of radiolarians. Large specimens of radiolarians and diatoms. Rare sponge spicules                                                                     | /                                   | /                                    |
| 1121B         | 181-1121B-10<br>R-3-115_116 | Dominance of sponge spicules and diatoms. Few radiolarians and silicoflagellates                                                                                 | /                                   | /                                    |

1121B 181-1121B-11 Dominance of diatoms with centric and tripolar forms. Abundant /  
R-1-135\_136 sponge spicules and numerous radiolarians /

**Table S3.** Cross-correlation of  $\text{bioSiO}_2$  flux ( $\text{g/cm}^2/\text{kyr}$ ) records between 57 and 60 Ma.

| Site/Hole 1 | Site/Hole 2 | Pearson coefficient | Best lag | Best lag (in Ma) | Value (best lag) | 95% confidence limit |
|-------------|-------------|---------------------|----------|------------------|------------------|----------------------|
| 384         | 700B        | -0.270              | -10      | -0.1             | -0.465           | 0.119                |
| 384         | 752A        | 0.028               | -13      | -0.13            | -0.175           | 0.119                |
| 384         | 1050A       | 0.179               | -5       | -0.05            | 0.231            | 0.119                |
| 384         | 1051A       | 0.304               | 21       | 0.21             | 0.498            | 0.119                |
| 384         | 1121B       | 0.424               | 16       | 0.16             | 0.620            | 0.122                |
| 700B        | 752A        | -0.078              | -18      | -0.18            | -0.163           | 0.118                |
| 700B        | 1050A       | -0.171              | -16      | -0.16            | -0.422           | 0.118                |
| 700B        | 1051A       | -0.327              | 21       | 0.21             | -0.378           | 0.118                |
| 700B        | 1121B       | -0.352              | -13      | -0.13            | -0.520           | 0.122                |
| 752A        | 1050A       | 0.052               | -21      | -0.21            | 0.243            | 0.117                |
| 752A        | 1051A       | 0.085               | -21      | -0.21            | 0.211            | 0.117                |
| 752A        | 1121B       | -0.127              | 21       | 0.21             | -0.336           | 0.122                |
| 1050A       | 1051A       | -0.292              | -21      | -0.21            | -0.412           | 0.115                |
| 1050A       | 1121B       | 0.079               | 21       | 0.21             | 0.468            | 0.122                |
| 1051A       | 1121B       | 0.641               | -13      | -0.13            | 0.817            | 0.122                |

**Table S4.** Cross-correlation of  $\text{bioSiO}_2$  flux ( $\text{g/cm}^2/\text{kyr}$ ) records between 62 and 63 Ma.

| Site/Hole 1 | Site/Hole 2 | Pearson coefficient | Best lag | Best lag (in Ma) | Value (best lag) | 95% confidence limit |
|-------------|-------------|---------------------|----------|------------------|------------------|----------------------|
| 208         | 384         | 0.550               | 4        | 0.04             | 0.736            | 0.272                |
| 208         | 700B        | -0.441              | 0        | 0                | -0.441           | 0.222                |
| 208         | 1050C       | -0.937              | 0        | 0                | -0.937           | 0.409                |
| 208         | 1051A       | -0.348              | 1        | 0.01             | -0.349           | 0.210                |
| 384         | 700B        | 0.514               | 4        | 0.04             | 0.594            | 0.260                |
| 384         | 1050C       | -0.159              | 8        | 0.08             | 0.645            | 0.377                |
| 384         | 1051A       | 0.217               | -14      | -0.14            | -0.612           | 0.260                |
| 700B        | 1050C       | 0.444               | -11      | -0.11            | -0.636           | 0.377                |
| 700B        | 1051A       | 0.446               | 6        | 0.06             | 0.710            | 0.214                |
| 1050C       | 1051A       | 0.433               | 6        | 0.06             | -0.480           | 0.377                |

**Table S5.** Cross-correlation between  $\text{bioSiO}_2$  flux and  $\%\text{CaCO}_3$  at each site between 57 and 60 Ma.

| Site/Hole | Pearson coefficient | Best lag | Best lag (in Ma) | Value (best lag) | 95% confidence limit |
|-----------|---------------------|----------|------------------|------------------|----------------------|
| 384       | 0.462               | 3        | 0.03             | 0.468            | 0.119                |
| 700B      | -0.086              | -13      | -0.13            | 0.547            | 0.193                |
| 752A      | -0.646              | -6       | -0.06            | -0.661           | 0.120                |
| 1050A     | -0.712              | -6       | -0.06            | -0.802           | 0.115                |
| 1051A     | 0.047               | 21       | 0.21             | 0.324            | 0.117                |
| 1121B     | -0.297              | 20       | 0.2              | 0.373            | 0.133                |
