# Supplementary material for: Biosiliceous and geochemical response to biotic and climatic events in the Palaeocene
Source: Copernicus journal article supplement (doi:10.5194/cp-21-1431-2025), 2025-08-08
Supplement: Supplementary file 2 [file cp-21-1431-2025-supplement.zip]

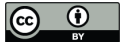

## *Supplement of*

# **Biosiliceous and geochemical response to biotic and climatic events in the Palaeocene**

**Cécile Figus et al.**

*Correspondence to:* Cécile Figus ([cecile.figus@phd.usz.edu.pl](mailto:cecile.figus@phd.usz.edu.pl))

- [cp-21-1431-2025-supplement-title-page.pdf](#)
- [Supplement.pdf](#)
- [palaeobathymetry](#)
  - [1050c\\_backtrack.txt](#)
  - [1050c\\_lithology.txt](#)
  - [1051\\_backtrack.txt](#)
  - [1051\\_lithology.txt](#)
  - [208\\_backtrack.txt](#)
  - [208\\_lithology.txt](#)
  - [384\\_backtrack.txt](#)
  - [384\\_lithology.txt](#)
  - [700\\_backtrack.txt](#)
  - [700\\_lithology.txt](#)

The copyright of individual parts of the supplement might differ from the article licence.
